# Supplementary material for: Cytochrome P450 Expression and Chemical Metabolic Activity before Full Liver Development in Zebrafish
Source: PubMed Central journal article supplement (PMC7763843; doi:10.3390/ph13120456), 2020-12-11
Supplement: pharmaceuticals-13-00456-s001.pdf [file pharmaceuticals-13-00456-s001.pdf]

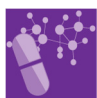

## Supplementary materials

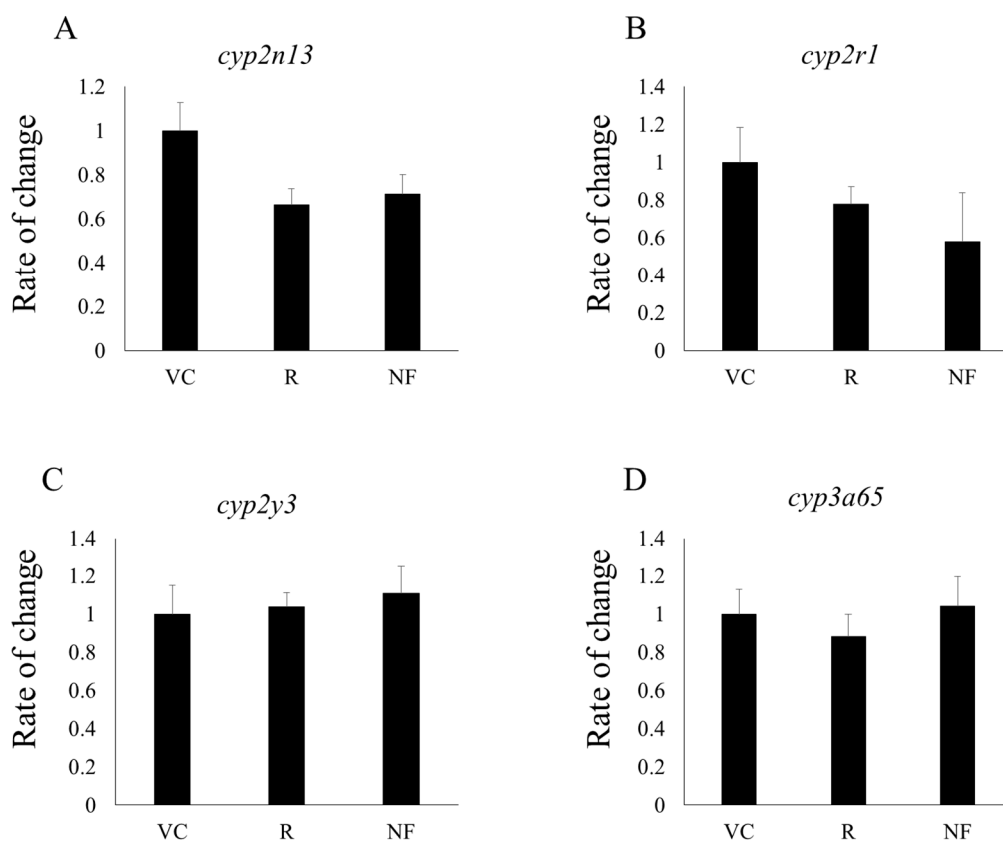

**Figure 1.** Effects of cytochrome P450 inducers on expression of a several CYP subtypes. Zebrafish embryos or larvae were exposed to 100  $\mu$ M rifampicin (R) and 100  $\mu$ M  $\beta$ -naphthoflavone (NF) from 26 hpf. VC means vehicle control (0.1% DMSO). cDNAs of larval zebrafish were prepared at 55 hpf for qPCR measurement of some CYP subtypes that showed positive signals by inducers with in situ hybridization.

**Table S1.** Primers used for quantitative real-time PCR

| <b>Primers</b>     | <b>Sequence (5'-3')</b> |
|--------------------|-------------------------|
| <i>cyp1a</i> -F    | TGCCGATTCATCCCTTTCC     |
| <i>cyp1a</i> -R    | AGAGCCGTA CTGATAGTGTC   |
| <i>cyp1b1</i> -F   | TCAGCTCGGTAACACTCCTC    |
| <i>cyp1b1</i> -R   | GGAATGAAGCAAAGTCGGGT    |
| <i>cyp1c1</i> -F   | GCGTAATTGAGCACGGGA      |
| <i>cyp1c1</i> -R   | CATCCATTGCATTGCTGTT     |
| <i>cyp1c2</i> -F   | TGGTGTAATGGATCATGCAG    |
| <i>cyp1c2</i> -R   | GCAGAAGCATCCAATTAAGC    |
| <i>cyp1d1</i> -F   | CGCCCTGACCTCTATACCTT    |
| <i>cyp1d1</i> -R   | GGATCAATCCCAGAGTCTCC    |
| <i>cyp2ad2</i> -F  | TGATCCAAACGAATGGGAAACC  |
| <i>cyp2ad2</i> -R  | TCAC TTGTTCTAACGTACAGAG |
| <i>cyp2k18</i> -F  | CAACAGCAGCCTCTCTTTCTC   |
| <i>cyp2k18</i> -R  | AGCGTCTGATTGCACACAG     |
| <i>cyp2n13</i> -F  | GCTTCATCCCAAAGGGCA      |
| <i>cyp2n13</i> -R  | CAGATCTTGAACGGGTGTGG    |
| <i>cyp2r1</i> -F   | CCGAGCCTCTCAGCGAAATTGG  |
| <i>cyp2r1</i> -R   | GTCAACATCAGAGGTCAG      |
| <i>cyp2y3</i> -F   | TGGAATGGGACGCAAACGAA    |
| <i>cyp2y3</i> -R   | CACCAGAGAGCAGATGACGT    |
| <i>cyp3a65</i> -F  | GGTACTTCAAGAAGCTGGGC    |
| <i>cyp3a65</i> -R  | GGTCACCACATCCATACTGTACG |
| <i>cyp3c1</i> -F   | TAGAACTCCGTGTTGAGGAGCGG |
| <i>cyp3c1</i> -R   | GCCTTCCATCATAGATCCCCC   |
| <i>cyp3c2/3</i> -F | GCAAGCGAGGCATTTTACA     |
| <i>cyp3c2/3</i> -R | TAAACACATCCACAAGGCCA    |
| <i>cyp3c4</i> -F   | CATTICTGTCGTGACCTGG     |
| <i>cyp3c4</i> -R   | ATTTTAACTGGCTGCTCCGGG   |

**Table S2.** Primers used for preparation of probes for *in situ* hybridization

| <b>Primers</b>    | <b>Sequence (5'-3')</b> |
|-------------------|-------------------------|
| <i>cyp2n13</i> -F | GCTTCATCCCAAAGGGCA      |
| <i>cyp2n13</i> -R | CAGATCTTGAACGGGTGTGG    |
| <i>cyp2r1</i> -F  | CCGAGCCTCTCAGCGAAATTGG  |
| <i>cyp2r1</i> -R  | GTCAACATCAGAGGTCAG      |
| <i>cyp2y3</i> -F  | TGGAATGGGACGCAAACGAA    |
| <i>cyp2y3</i> -R  | CACCAGAGAGCAGATGACGT    |
| <i>Cyp3a65</i> -F | GGTACTTCAAGAAGCTGGGC    |
| <i>Cyp3a65</i> -R | GGTCACCACATCCATACTGTACG |
